# Supplementary material
Source: Springer Nature journal article supplement (https://www.springermedizin.de/resource/supplementary/12985_2013_2312_MOESM6_ESM.pdf/9606310)

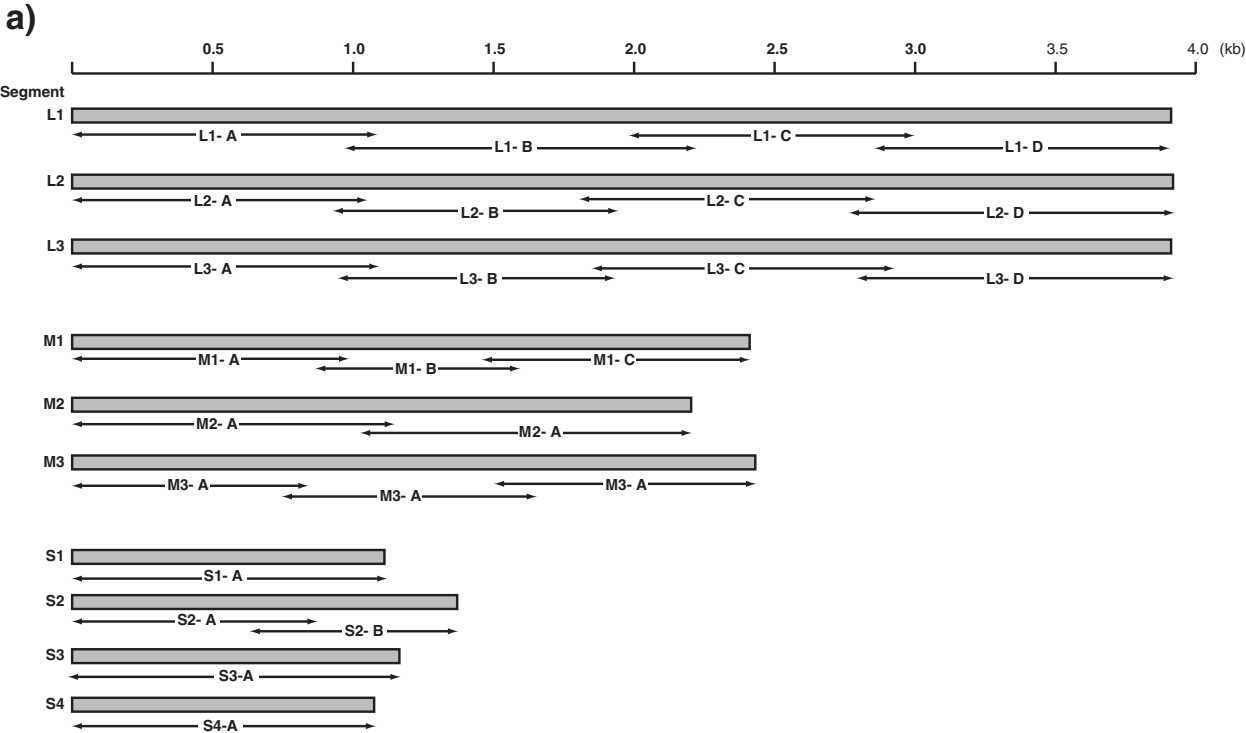

**b)**

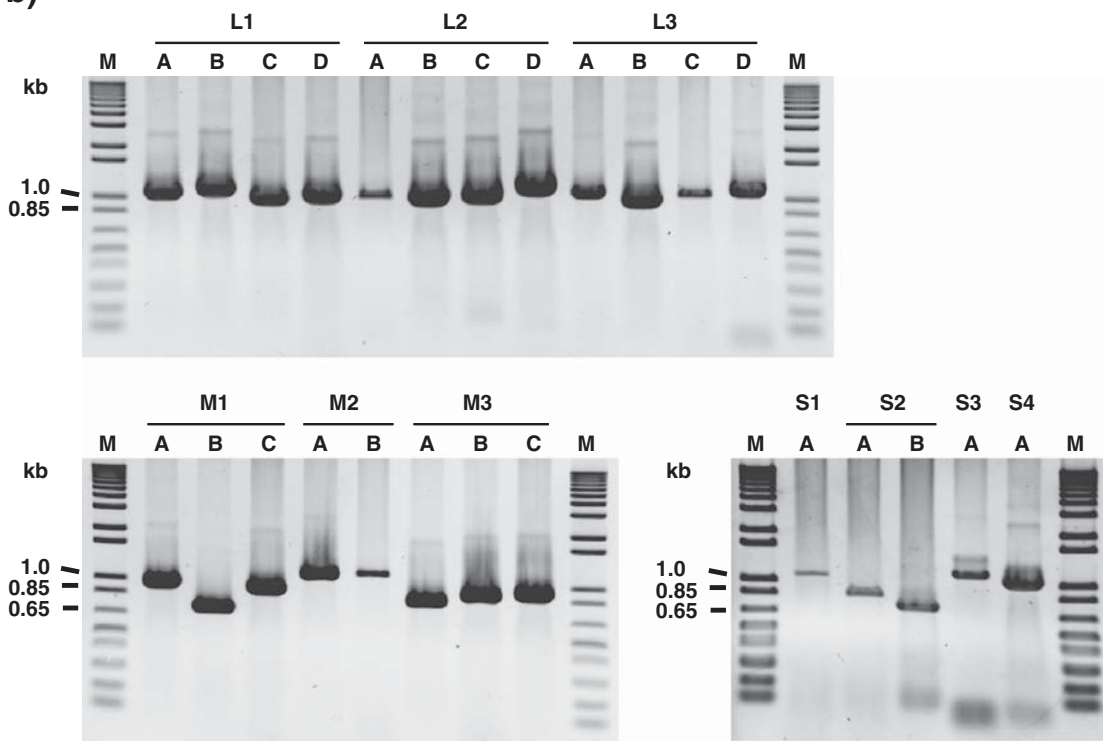

Supplement: MOESM6 [file 9606310]
